# Supplementary material for: Comparative Analysis of Vascular Mimicry in Head and Neck Squamous Cell Carcinoma: In Vitro and In Vivo Approaches
Source: MDPI journal article supplement (doi:10.3390/cancers13194747), 2021-09-23
Supplement: s1 [file s1]

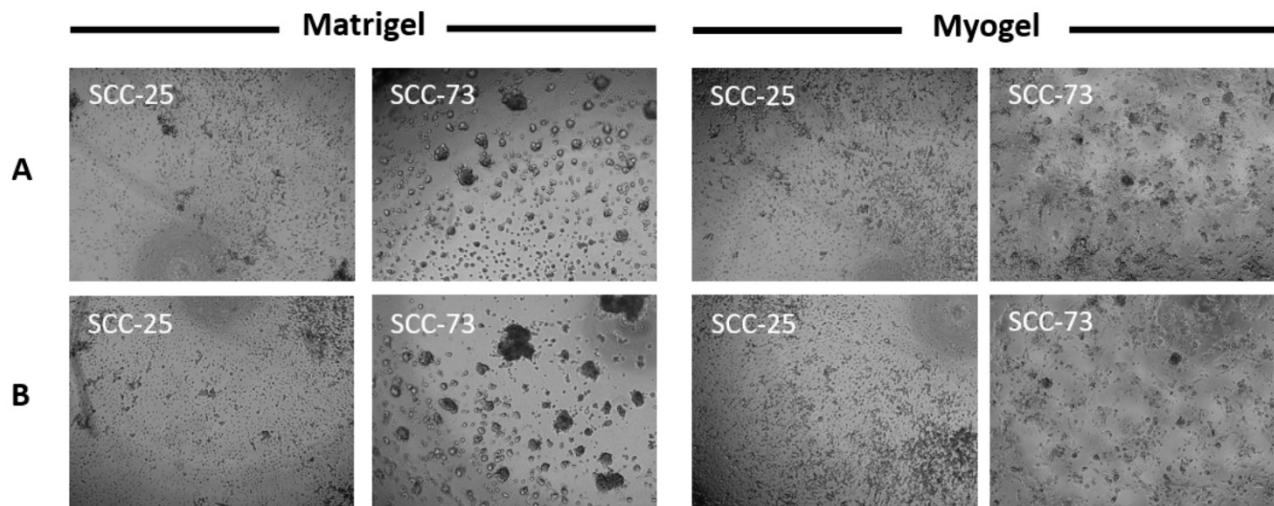

**Figure S1.** Two primary cell lines (SCC-73 and SCC-25) were not able to initiate own tubulogenesis in either Matrigel or Myogel, where they remained dispersed as round cell aggregates (A,  $40 \times 10^3$  cells; B,  $60 \times 10^3$  cells).

**Table S1. Patient-derived cell lines and their corresponding data.**

| HNSCC cell line | Sex | Age (years) | TNM*    | Site           | Type | Grade | Passage** |
|-----------------|-----|-------------|---------|----------------|------|-------|-----------|
| UT-SCC-8        | M   | 42          | T2M0N0  | Larynx         | Pri  | G1    | 51        |
| UT-SCC-14       | M   | 25          | T3N1M0  | Tongue         | Pri  | G2    | 33        |
| UT-SCC-24A      | M   | 41          | T2N0M0  | Tongue         | Pri  | G2    | 14        |
| UT-SCC-24B      | M   | 41          | T2N1M0  | Neck           | Met  | G2    | 15        |
| UT-SCC-28#      | F   | 48          | T2N0M0  | Floor of mouth | Pri  | G1    | 30        |
| UT-SCC-40       | M   | 65          | T3N0M0  | Tongue         | Pri  | G1    | 10        |
| UT-SCC-44       | F   | 71          | T4N2BM0 | Gingiva        | Pri  | G3    | 33        |
| UT-SCC-73       | F   | 86          | T1N0M0  | Tongue         | Pri  | G2    | 16        |
| UT-SCC-81       | M   | 48          | T2N0M0  | Tongue         | Pri  | G1    | 16        |
| UT-SCC-106A     | M   | 37          | T1N0M0  | Larynx         | Pri  | G1    | 17        |

HNSCC, head and neck squamous cell carcinoma; M, male; F, female; Pri, primary tumour; Met, metastatic; TNM, tumour, lymph node, and distant metastasis staging. \*TNM is based on the pathology report. \*\*Indicates cell line passage number during the first experiment. # The primary tumour was treated with radiotherapy prior to the surgical resection.
